# Supplementary material for: RainForest: A random forest algorithm for quantitative precipitation estimation over Swizerland
Source: Copernicus journal article supplement (doi:10.5194/amt-2020-284), 2020-09-28
Supplement: Supplementary file [file amt-2020-284-AC2-supplement.pdf]

# Review RainForest

daniel.wolfensberger

December 2020

## 1 Reviewer 1

We are thankful to reviewer 1 for agreeing to review the article and for his helpful recommendations. We have improved the article in the following way:

- We have fixed the missing commas after However, Finally and Thus (see modified version of the article), as well as the term relations by relationships in some sentences.
- Regarding Fig.5, indeed as was also pointed out by Reviewer 2, this figure needed some improvement. It has hence been edited by replacing the labels with names that agree with the text of the paper, by solving the issue of overlapping labels and by choosing different colors for all slices of the pie-charts.
- We have now chosen to use the notation x-minute throughout the article, when referring to a certain quantity (for example 10-minute QPE maps).

## 2 Reviewer 2

We are thankful to reviewer 2 for reviewing the article and for the many useful suggestions that are proposed. We will address here every point that was raised by the reviewer.

### 2.1 General Comments

1. Thank you.
2. We thought about this point and tried to add a table in the appendix. However, this table ended up being quite short (only a few items) since it included specific acronyms only (CPC, RZC, RF\_dualpol, RF). Indeed, we think that acronyms such as QPE, VPR, RMSE, and others are fairly common in the radar meteorology field and should not necessarily be summarized in a table. In the end, since this table was so short it was decided not to keep it.
3. Unfortunately, there is no dual-polarization QPE product available at MeteoSwiss at the moment. A model could be implemented from the literature but it would require to be adapted and calibrated to the Swiss radar system, which would require an amount of work similar to the development of this QPE RF. Unfortunately it could not be run retroactively over the four years of data in the archive as that would be too computationally expensive. It could thus only be used for the event-based comparison (Section 5.). Before experimenting with RF, we had implemented a simple KDP estimation method and had run it for a couple of events, but the performance was very poor. Even if it is non-polarimetric, RZC has been specifically designed for the Swiss radar configuration and topography (VPR correction) and has been fine-tuned over many years. As such we think that it is a fairer competitor to RF than an uncalibrated polarimetric QPE model taken from the literature.
4. Thank you for pointing this out. We have added the following line in the paper: *Table 1 summarizes the differences in spatial and temporal support between all different data sources used in this work.*
5. The overall scores reported in Section 4. consider all 4 years of observations. The goal of the event based analysis in Section 5. is to verify if this overall performance gain is also valid for individual events. We decided to choose only 6 different events corresponding to very different weather situations, because it makes it easier to get a specific overview. Indeed Figure 15 is already very dense with 6 events only. Considering more events would make it difficult to assess the performance separately for each event and assessing the average performance for all events, would not be very relevant as this would be somewhat redundant with Section 3.
6. We have added an explicit reference to RF\_dualpol\_AC in Section 5.1. *In the following the term RF\_dualpol\_AC will be used for the RF product obtained with dual-polarization inputs and smoothed with the advection-correction method.*

7. We have added some short description of random forests in the paragraph 5 of the introduction.
8. Thank you for this advice, I must admit I tend to forget this issue. All plots have been checked with a colorblind simulator<sup>1</sup>. Fortunately most figures were readable because green and red colors are usually not present together in the figures. However, Figures 4 and 15 were problematic. The colormaps for these figures have thus been replaced by more colorblind friendly ones.
9. We agree that some fonts were too small to be readable. We have increased the font size in the most problematic figures, in particular Fig.1, 4, 5 8 and 9.

## 2.2 Specific comments

1. Thank you, this has been fixed
2. We have removed this first reference to COSMO and replaced it by *(from point measurements to large area numerical weather prediction fields)*. Few lines later the COSMO model is introduced a bit more clearly: *For numerical prediction, MeteoSwiss runs the COSMO Model which is a mesoscale limited area model that is operated and developed by several weather services in Europe (e.g. Switzerland, Italy, Germany, Poland, Romania, and Russia) ....*
3. This is not a footnote, but the name of the model. Indeed Ott uses an exponent for the “2”, which I agree is not very convenient when written in a text: <https://www.ott.com/products/accessories-109/ott-pluvio2-weighing-rain-gauge-963/>.
4. We have changed the term visibility to VIS in Table 2 and Figure 5, to be more consistent.
5. This figure has been edited by using a monochrome colormap for the density plot and by using colorblind friendly colors for the lines. The colorbar has been added.
6. The names in the legend have been modified to agree with the Table in p.16 (note that this table was previously unreferenced in the article but is now Table 3) as well as the text in Section 3.2. We have also emphasized the fact that the green fit in the left panel is used to get the density plot in the right panel.
7. We have added the full name of the stations which should make their location more explicit for people who are familiar with the geography of the Alps. We have also given some context on their location (mountain summits or passes).
8. This figure has been modified to make the pie-charts larger and to make sure no colors are duplicated and no labels overlap. The labels have also been modified to agree with Table 2. Concerning  $FRAC_{RADAR}$ , it is now referred to as  $Frac_{rad}$  throughout the text and it is explained in Section 3. We have also added one sentence in the caption of this Figure to make this clearer. *The importance of the feature  $Frac_{rad}$  is the sum of the importance of the fraction of every single radar (see Section 3.3).*
9. This has been fixed, the table has now a caption and a label and is referred in the text.
10. They are different terms. Daily implies that all displayed values in the first panel are daily average RMSE values. Then this signal of daily average RMSE values is decomposed with an algorithm into a long term trend, a seasonal trend and residuals (i.e. fluctuations that are neither seasonal nor a long-term trend). Residual refers thus to fluctuations in the daily RMSE that have neither seasonal trend nor long-term trend. It was quite confusing in the text, because the term daily was used for fluctuations as well. We have made this clearer in the caption and in the text above the figure.
11. We have removed overlaps between labels and standard deviation indicators. The figure should be more readable now. Note that the new figures shows very tiny deviations from the values in the previous figure due to the fact that the cross-validation procedure was repeated to generate a new plot and it is stochastic by nature.
12. We have added x and y-axis labels which make it clear that these are Swiss CH1903 coordinates in km scale.
13. Besides the added definition of RF\_dualpol\_AC in Section 5.1, we have added a definition in the text in line 22: *In contrast, the performance of RF\_dualpol\_AC, the RF dual-polarization QPE with a-posteriori advection-correction (Section 5.1), is much poorer and it often overestimates.*
14. We have changed the colormap of this plot to a transition from red (worst performance) to blue (best performance) through white. This makes it easier to read and is more colorblind friendly. An important thing is that the colormap is defined separately for every score and every event. The worst performing method has the darkest red and the best performing method the darkest blue, all others have colors that are interpolated linearly in between. Indeed it is difficult to define a global colormap that would be valid for all events, since the scores are very much dependent on the intensity of the event. We have added a colorbar at the bottom of the plot to make it clearer.

---

<sup>1</sup><https://www.color-blindness.com/coblis-color-blindness-simulator/>

15. We have added the following sentence at the beginning of this paragraph: *The best-performing QPE is almost systematically CPC.CV. Since this method uses also ground measurements, the comparison with pure radar products such as RZC and the RF QPE, is not fair, but the performance of CPC.CV can be considered as an asymptotic ideal performance, to which the best-possible radar QPE should tend..*

### 2.3 Specific comments

1. What a shame...this has been corrected.
2. Corrected
3. Corrected
4. Corrected
5. This was changed to : *which try to estimate the observed value as a function of raw predicted values.*

### 2.4 Very minor corrections

Due to the relatively short time available for the review, some of the points here could not be tackled, but we have tried to address as many as possible.

1. Besides the modifications explained in point 6 of 2.2, we have also extended the 1:1 lines to the limits of the figure, removed the grid and increased the size of the figure from one column to two columns in the text, as was suggested.
2. We have changed the aspect ratio to 1:1 for each subplot, have modified the legend box to reduce the overlap with the density plot and have increased the font size to make it larger. Unfortunately we cannot change the size of the figure as AMT uses standard sizes (8.3 cm for one column, 12 cm for two columns).
- 3.
4. Color of the line in the top panel has been changed to black instead of blue.
5. We have extended the 1:1 line to the corners and have moved the legend box so it doesn't overlap the subplots borders.
- 6.
